# Supplementary material for: Abortion access in the Americas: a hemispheric and historical approach
Source: Front Public Health. 2023 Dec 6;11:1284737. doi: 10.3389/fpubh.2023.1284737 (PMC10730672; doi:10.3389/fpubh.2023.1284737)
Supplement: Supplementary file 1 [file Table_1.xlsx]

## Sheet: Table 1
	On-demand abortion (gestational limit)	Prohibited altogether	Broad social/economic grounds	To save the life of the pregnant person	To preserve the health of the pregnant person	Fetal diagnosis	Rape/Incest
United States	*			*	*		*
Mexico	* (12, 13)^
Guatemala				x
Belize			x			x
Cuba	12
Haiti		x^
Dominican Republic		x
Honduras		x
El Salvador		x
Nicaragua		x
Costa Rica					x
Panama				x		x	R
Jamaica		x
Colombia	24
Venezuela				x
Guyana	8
Suriname		x
French Guiana	12
Ecuador					x+		R
Peru					x
Bolivia					x (mh)		R, I
Brazil				x		x	R
Paraguay				x
Chile				x		x	R
Argentina	14
Uruguay	12
^ laws pending
* dependent on state laws
(+) additional grounds
(mh) mental health explicit
Sources: Center for Reproductive Right. The World’s Abortion Laws [Internet]. 2023 [cited 2023 Nov 27]. Available from: https://reproductiverights.org/maps/worlds-abortion-laws/; Grupo de Información en Reproducción Elegida (GIRE). El aborto en los códigos penales. [cited 2023 Aug 17]. El aborto en los códigos penales. Available from: https://gire.org.mx/plataforma/causales-de-aborto-en-codigos-p…
