# Supplementary material for: Abortion access in the Americas: a hemispheric and historical approach
Source: Front Public Health. 2023 Dec 6;11:1284737. doi: 10.3389/fpubh.2023.1284737 (PMC10730672; doi:10.3389/fpubh.2023.1284737)
Supplement: Supplementary file 2 [file Table_2.xlsx]

## Sheet: Table 2
	On demand (gestational limit in weeks)	Full ban	To protect pregnant person's life/health***	Rape (gestational limit in weeks)/Incest (gestational limit in weeks)	Nonmedically viable fetus	Ectopic Pregnancy	Major fetal anomalies	Economic Reasons	Non-consensual Artificial Insemination
United States
Alabama			l
Alaska	Viability
Arizona	15		x**
Arkansas			l			x
California	Viability
Colorado	x
Connecticut	Viability
Delaware	Viability
District of Columbia	x
Florida	15 (6)*
Georgia	6
Hawaii	Viability
Idaho			l	R, I (first trimester if reported to law enforcement)
Illinois	Viability
Indiana			l
Iowa	22 (6)*
Kansas	22
Kentucky			l
Louisiana			l
Maine	Viability
Maryland	x
Massachusetts	24
Michigan	Viability
Minnesota	x
Mississippi			l	R, I (if reported to law enforcement)
Missouri			l
Montana	Viability (20)*
Nebraska	12
Nevada	Viability
New Hampshire	24
New Jersey	x
New Mexico	x
New York	Viability
North Carolina	12
North Dakota			l	R, I (6)
Ohio	22 (6)*
Oklahoma			l
Oregon	x
Pennsylvania	24
Rhode Island	Viability
South Carolina	6
South Dakota			l
Tennessee			l
Texas					x	x
Utah	18		l**	R, I **
Vermont	x
Virginia	Viability
Washington	Viability
West Virginia			x**	R, I (8 if reported to law enforcement; 14 if minor and reported to law enforcement)	x	x
Wisconsin	Viability (22)*
Wyoming	Viability		x**	R, I **
Puerto Rico			x (mh)
Guam	13
American Samoa			x
U.S. Virgin Islands	Viability
*** restrictions on definition of threat to life/health vary
** more restrictive ban under injunction
*mpre restrictive ban under injunction with weeks in ()
(mh) mental health explicit
l, life; h, health
Mexico*^
Aguascalientes	12
Baja California	12
Baja California Sur	12
Campeche			h	x
Chiapas			l	x			x
Chihuahua			h	x					x
Ciudad de México	12
Coahuila	12
Colima	12
Durango			l	x
Guanajuato				x
Guerrero	12
Hidalgo	12
Jalisco			l, h	x
Mexico State			l	x			x
Michoacán			h	x			x	x	x
Morelos			l	x			x		x
Nayarit			l, h	x
Nuevo León			l, h	x
Oaxaca	12
Puebla			l	x			x
Querétaro				x
Quintana Roo	12
San Luis Potosí			l	x					x
Sinaloa	13
Sonora			l	x
Tabasco			l	x					x
Tamaulipas			l, h	x
Tlaxcala			l, h	x			x		x
Veracruz	12
Yucatán			l	x			x	x	x
Zacatecas			l, h	x
* Abortion allowed for other reasons past on-demand gestational limits in states with on-demand laws.
^Legislation pending
l, life; h, health
Sources: Center for Reproductive Right. The World’s Abortion Laws [Internet]. 2023 [cited 2023 Nov 27]. Available from: https://reproductiverights.org/maps/worlds-abortion-laws/; Grupo de Información en Reproducción Elegida (GIRE). El aborto en los códigos penales. [cited 2023 Aug 17]. El aborto en los códigos penales. Available from: https://gire.org.mx/plataforma/causales-de-aborto-en-codigos-p…
